# Supplementary material
Source: PubMed Central journal article supplement (PMC3107325)
Supplement: 1018109108_pnas.201018109SI.pdf [file 1018109108_pnas.201018109SI.pdf]

# Supporting Information

Nakamura et al. 10.1073/pnas.1018109108

## SI Materials and Methods

**Plasmid Constructions.** pBSAA is a versatile cloning shuttle vector. pBSAA was constructed by introducing an AscI site into either end of the multiple cloning site (MCS) of pBluescript KS(-) (Stratagene).

pBSSA-AR is a *Hydra* transformation vector. pBSSA was constructed by introducing an AscI site into the 5'-most side of SacI of the MCS of pBluescript KS(-). The *Hydra actin* promoter and *RFP* gene was cloned from pHyVec5 (gift of R. Steele, Department of Biological Chemistry, University of California Irvine, Irvine, CA, GenBank accession no. DQ344484) into pBSSA, which resulted in pBSSA-AR.

pBSSA-AR-hsp.mini-EGFP is a *Hydra* enhancer detector vector. For the heterologous reporter construct, the core promoter (-122 to -50 bp) of the *Hydra hsp70.1* gene (1) was amplified from genomic DNA and cloned upstream of EGFP in pBSSA-AR, generating pBSSA-AR-hsp.mini-EGFP.

The HyWnt3FL-EGFP reporter gene was cloned a PstI-SpeI fragment from hoT G-HyWnt3FL-EGFP into PstI and XbaI digested pBSAA, which resulted in pBSAA-HyWnt3FL-EGFP. The deletion and mutation constructs of HyWnt3FL were generated by PCR and/or restriction digest by using pBSAA-HyWnt3FL-EGFP and subsequently cloned into the AscI site of pBSSA-AR or the MCS of pBSSA-AR-hsp.mini-EGFP. pBSSA-AR-HyWnt3FL was generated by cloning a HyWnt3FL-EGFP fragment into pBSSA-AR. Primer sequences used for the constructs are provided in Table S6.

For D1-2129/-1517, D1-1494/-985, D1-1201/-604, and D1-842/-406, each fragment was amplified by PCR with specific primers, digested with XbaI, and relegated.

For -985, the fragment was amplified as a fragment containing EGFP by PCR, digested with XbaI and NcoI, and cloned into SpeI and NcoI-digested pBSSA-AR-HyWnt3FL.

For -985/-479, HyWnt3act, and -758/-386, each fragment was amplified by PCR, cut with SalI and BamHI, and cloned into the corresponding sites of pBSSA-AR-hsp.mini-EGFP.

-2149/-386 was amplified by PCR, cut with KpnI and BamHI, and cloned into the corresponding sites of pBSSA-AR-hsp.mini-EGFP.

HyWnt3prox was constructed by digestion of D1-842/-406 with SpeI and XbaI.

Act-Wnt3prox was generated by introducing the *Hydra actin* promoter (-1,300 to -221 bp), forming KpnI-XbaI fragment into HyWnt3prox digested with KpnI and XbaI.

The Act-hsp.mini was generated by introducing the HyActin 5' sequence as a XhoI-XbaI fragment into SalI and XbaI sites of the pBSSA-AR-hsp.mini-EGFP.

For mTCFall, mTCF1, mTCF2, and mTCF3, TCF-binding sites were mutated by using site-directed mutagenesis. Base substitutions (indicated in Table S6 in lowercase) were A to C or T to G (or vice versa). Subsequent cloning followed the -985/-386 construction.

For Hy $\beta$ -catenin-EGFP, 5' (2,520 bp) and 3' (598 bp) flanking regions of *Hy $\beta$ -catenin* were amplified from genomic DNA by PCR and cloned upstream and downstream of EGFP of pBSAA containing EGFP, respectively. Subsequently, *Hy $\beta$ -catenin* cDNA was cloned downstream of the *Hy $\beta$ -catenin* 5' flanking sequence and upstream of the EGFP.

1. Gellner K, Praetzel G, Bosch TC (1992) Cloning and expression of a heat-inducible hsp70 gene in two species of *Hydra* which differ in their stress response. *Eur J Biochem* 210: 683-691.





## Other Supporting Information Files

[Table S1 \(DOC\)](#)

[Table S2 \(DOC\)](#)

[Table S3 \(DOC\)](#)

[Table S4 \(DOC\)](#)

[Table S5 \(DOC\)](#)

[Table S6 \(DOC\)](#)

[Table S7 \(DOC\)](#)
